# Supplementary material for: EIF4A3-mediated biogenesis of circSTX6 promotes bladder cancer metastasis and cisplatin resistance
Source: Springer Nature journal article supplement (doi:10.1186/s13046-023-02932-6), 2024-01-02
Supplement: MOESM5 [file 26583702]

Fig.S1

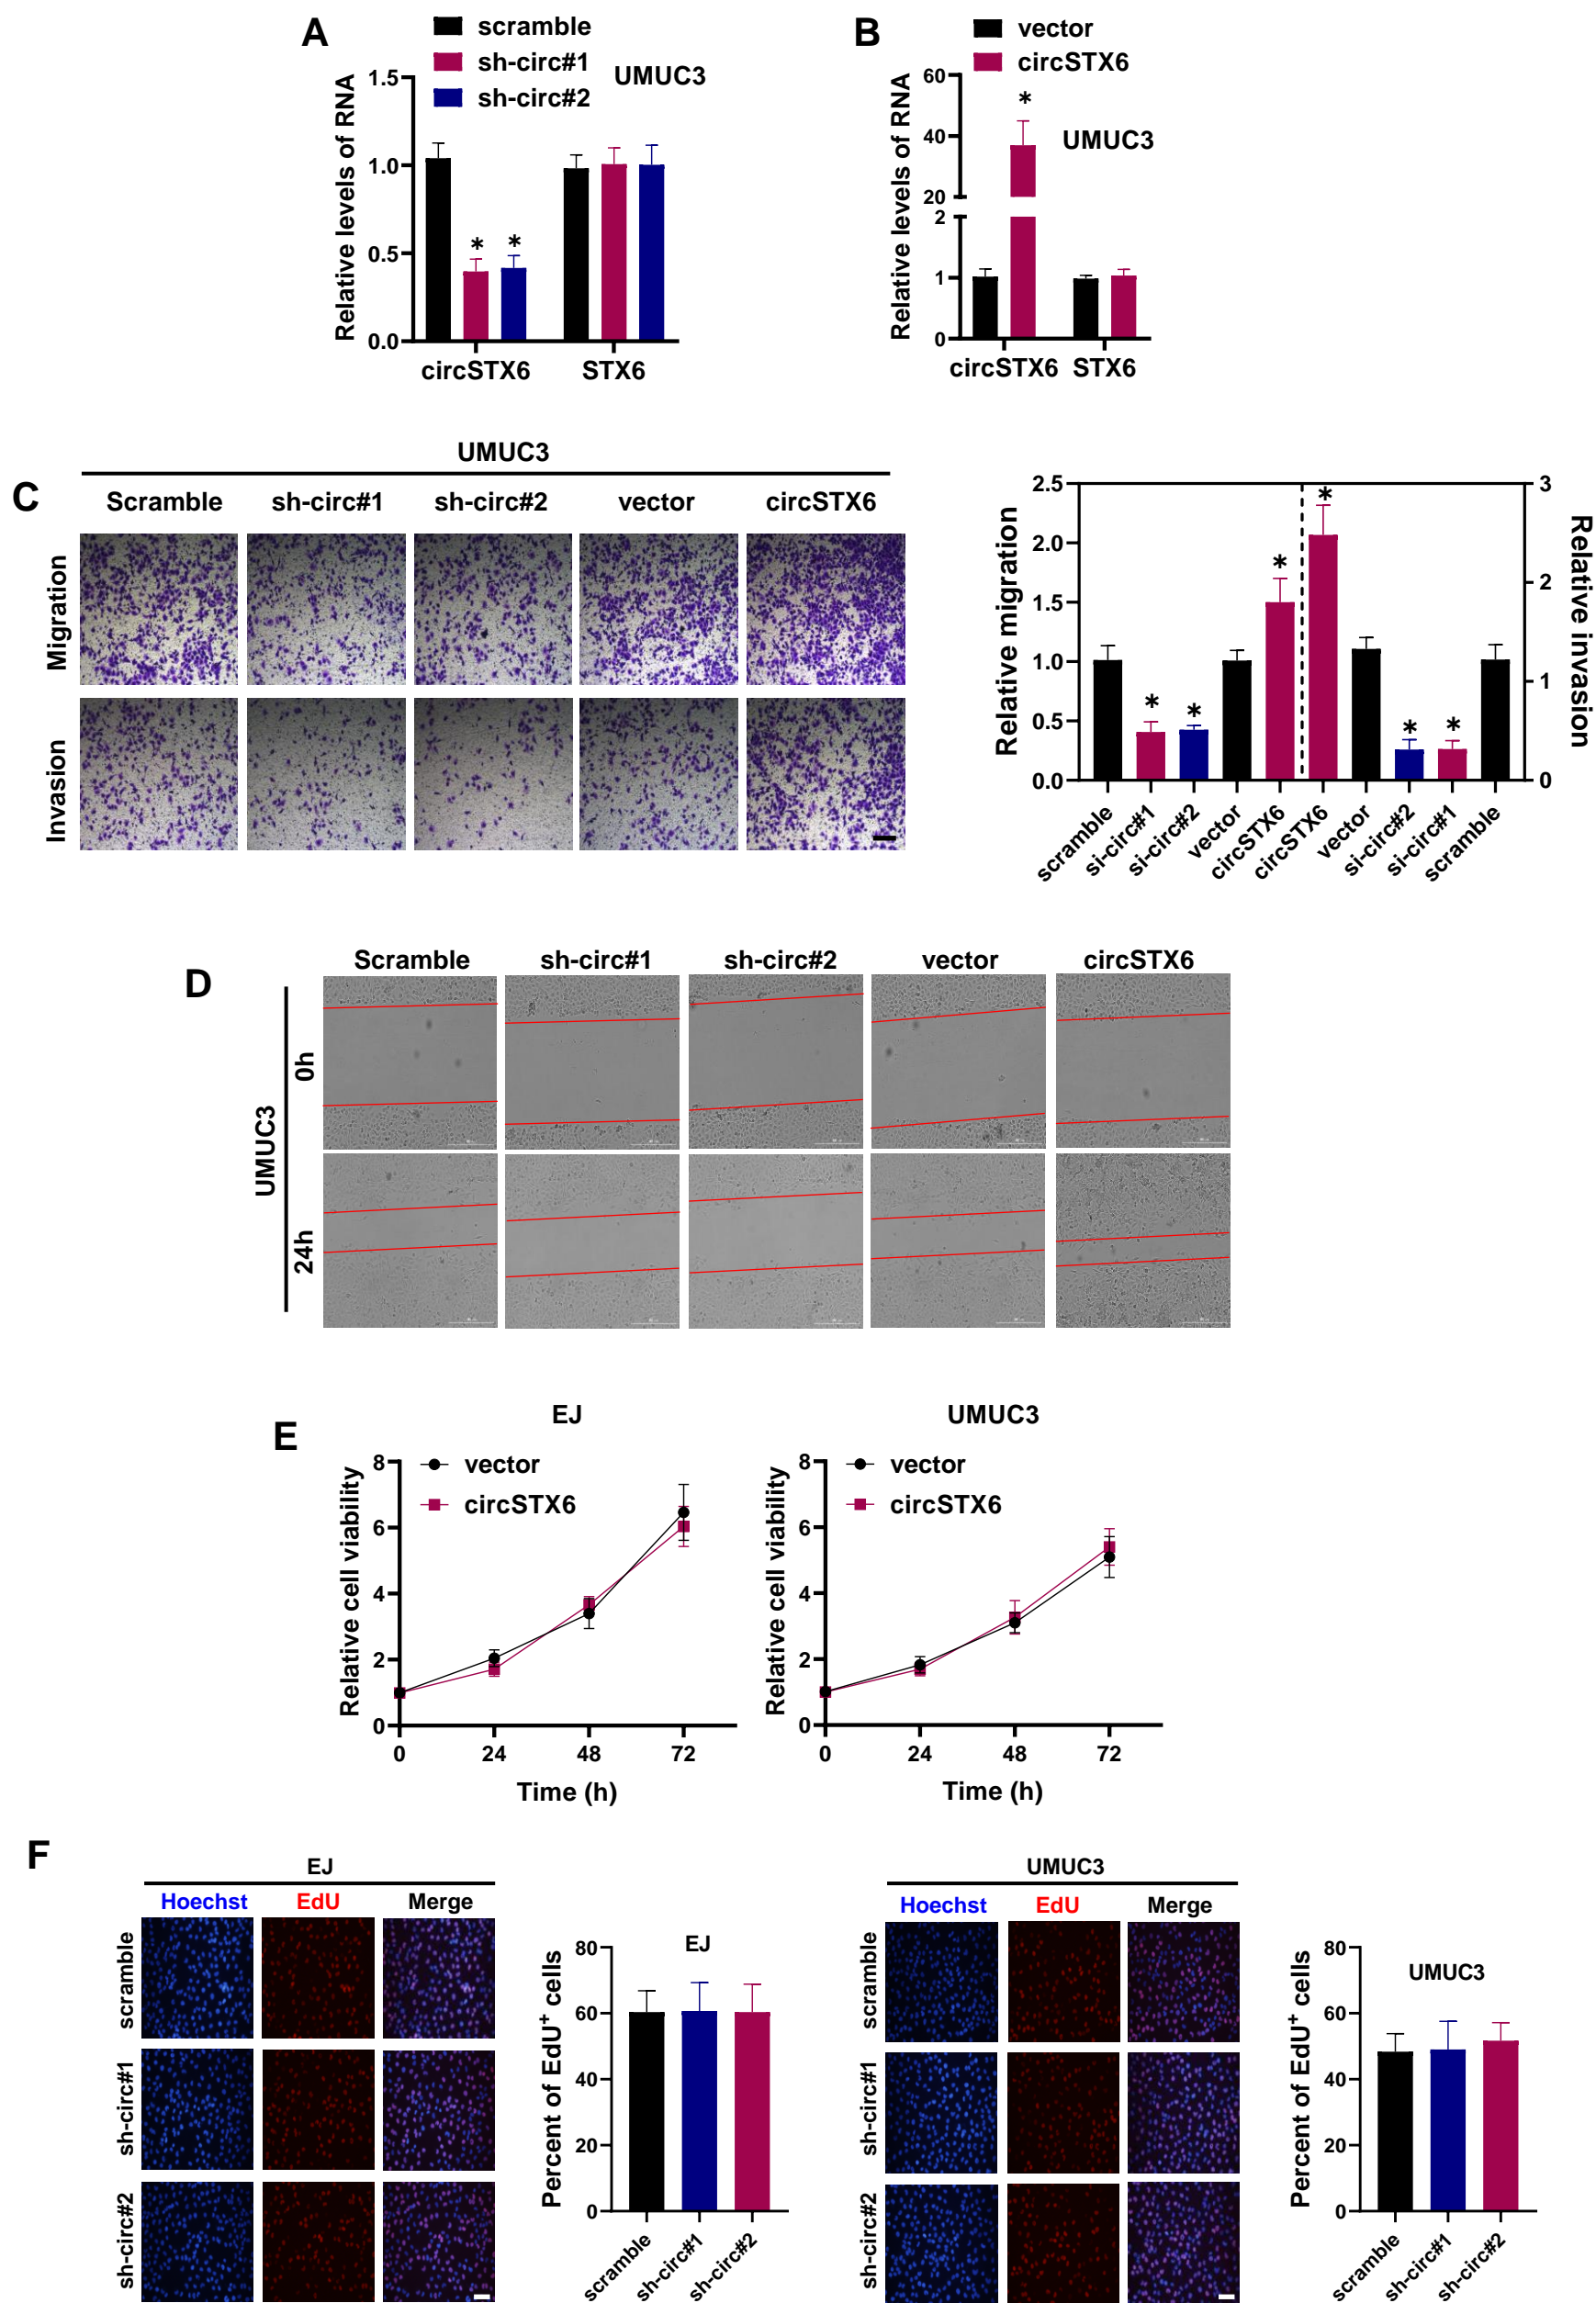

FigS1. *CircSTX6* promotes the metastasis in BCa. **A** The knockdown and efficiency of *circSTX6* in UMUC3 cells was detected by qRT-PCR. **B** The overexpression efficiency of *circSTX6* in UMUC3 cells was detected by qRT-PCR. **C** Representative and quantified results of the Transwell migration and invasion assays in UMUC3 cells transfected with scramble, sh-circ#1, sh-circ#2, vector or *circSTX6*. Scale bar, 100  $\mu\text{m}$ . **D** Cell migratory capabilities were assessed by wound healing assays after knocking down or overexpressing *circSTX6* in UMUC3 cells. Scale bar, 400  $\mu\text{m}$ . **E** CCK-8 assays showed the viability of BCa cells stably transfected with vector or *circSTX6*. **F** Edu assays depicted the proliferation rate of BCa cells stably transfected with scramble, sh-circ#1 or sh-circ#2. Scale bar, 200  $\mu\text{m}$ . The data are presented as the means  $\pm$  S.D. of at least three independent experiments.  $*P < 0.05$ . *P* values are calculated by Student's *t* test in **B** and **C** and one-way ANOVA in **A** and **C**.

**Fig.S2**

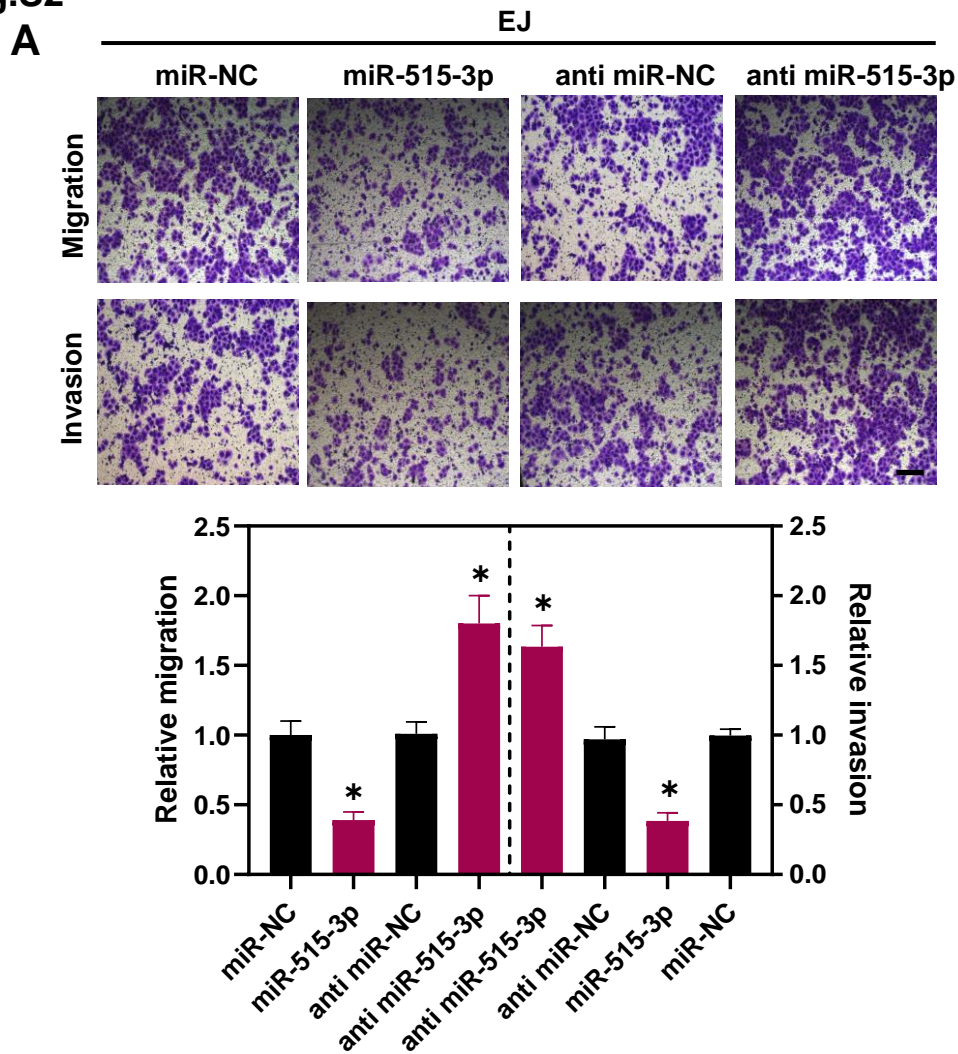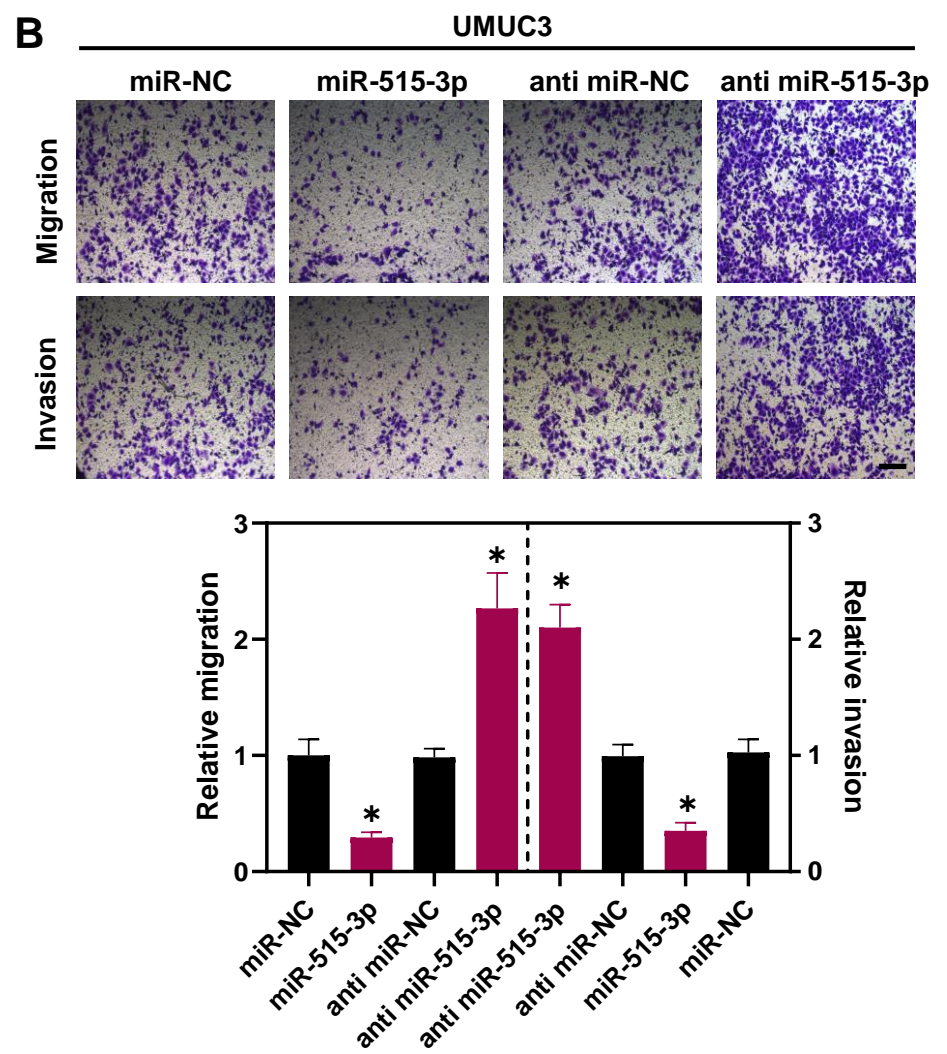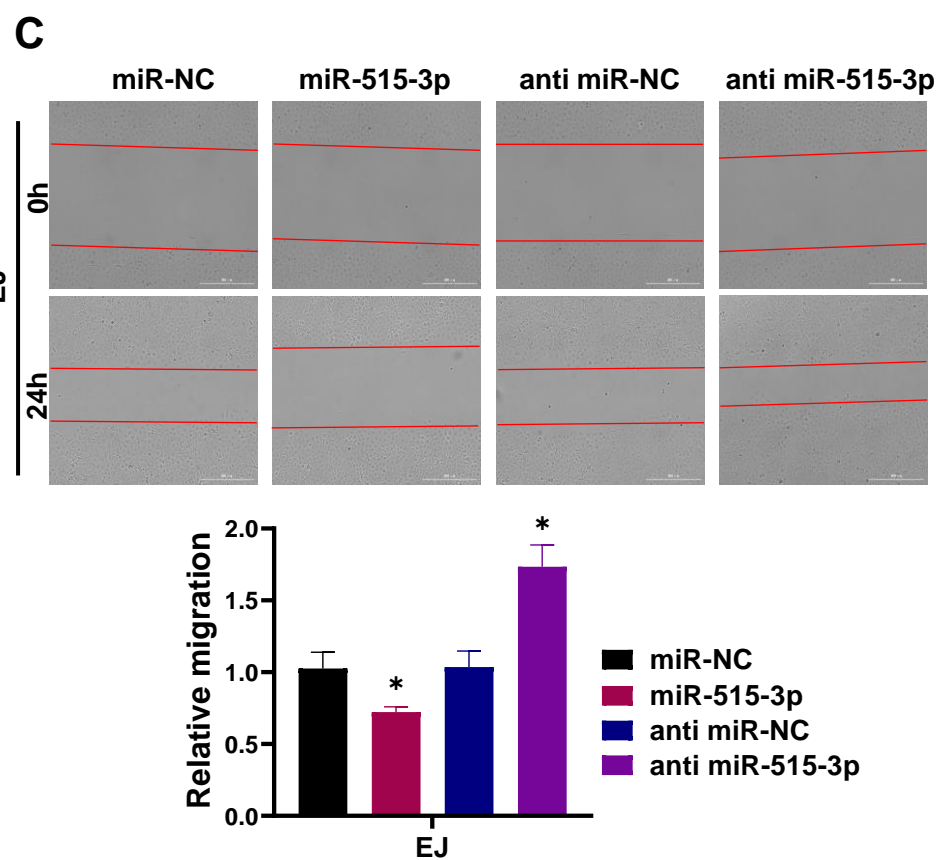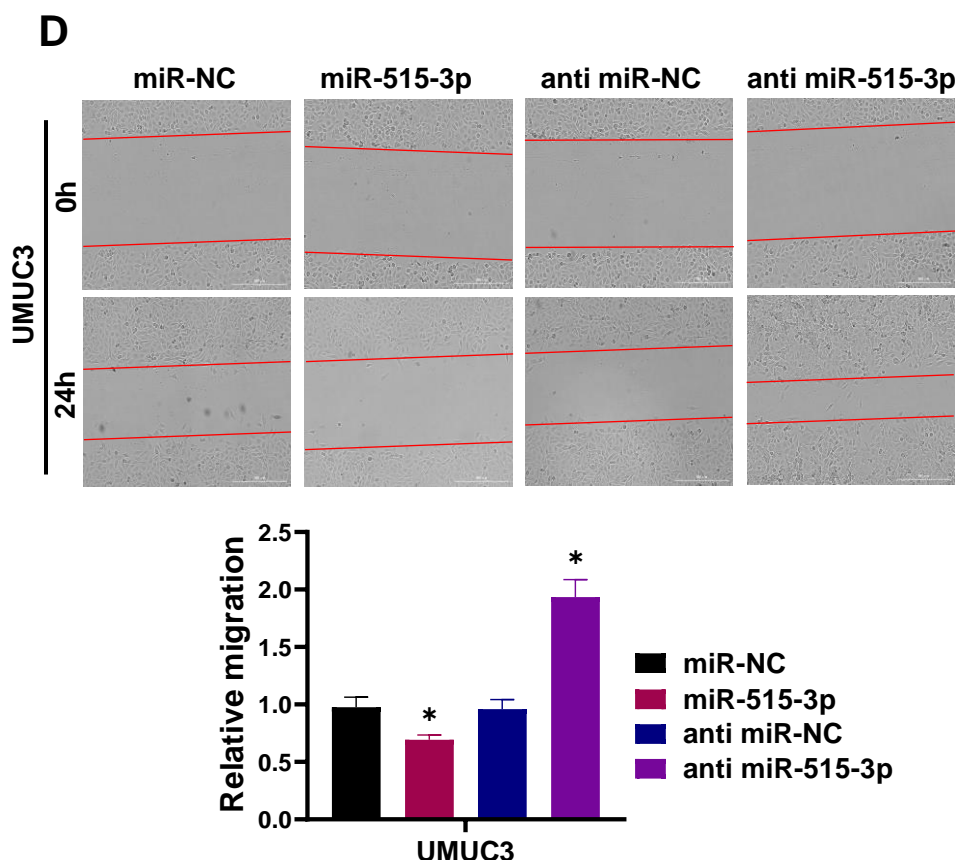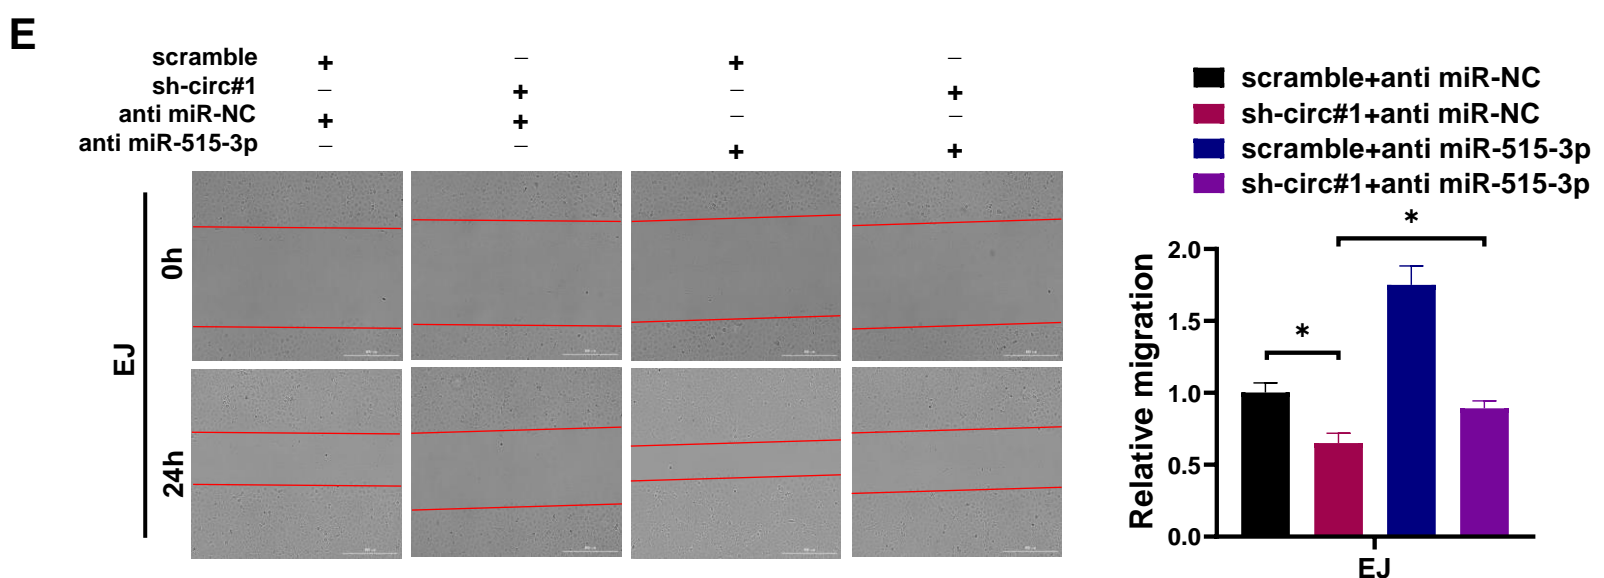

FigS2. *miR-515-3p* inhibits BCa migration and invasion *in vitro*. **A-B** The influence on cell migration and invasion abilities of EJ (A) and UMUC3 (B) cells transfected with miR-NC, miR-515-3p, anti-miR-NC or anti miR-515-3p. Scale bar, 100  $\mu$ m. **C-D** Cell migratory capabilities were assessed in BCa cells transfected with miR-NC, miR-515-3p, anti-miR-NC or anti miR-515-3p by wound healing assays. Scale bar, 400  $\mu$ m. **E** Wound healing assays showed the migration abilities in EJ cells transfected with scramble or sh-circ#1, and those co-transfected with anti-miR-NC or anti miR-515-3p. Scale bar, 400  $\mu$ m. The data are presented as the means  $\pm$  S.D. of at least three independent experiments. \* $P < 0.05$ . P values are calculated by Student's t test in **A-D** and one-way ANOVA in **E**.

Fig.S3

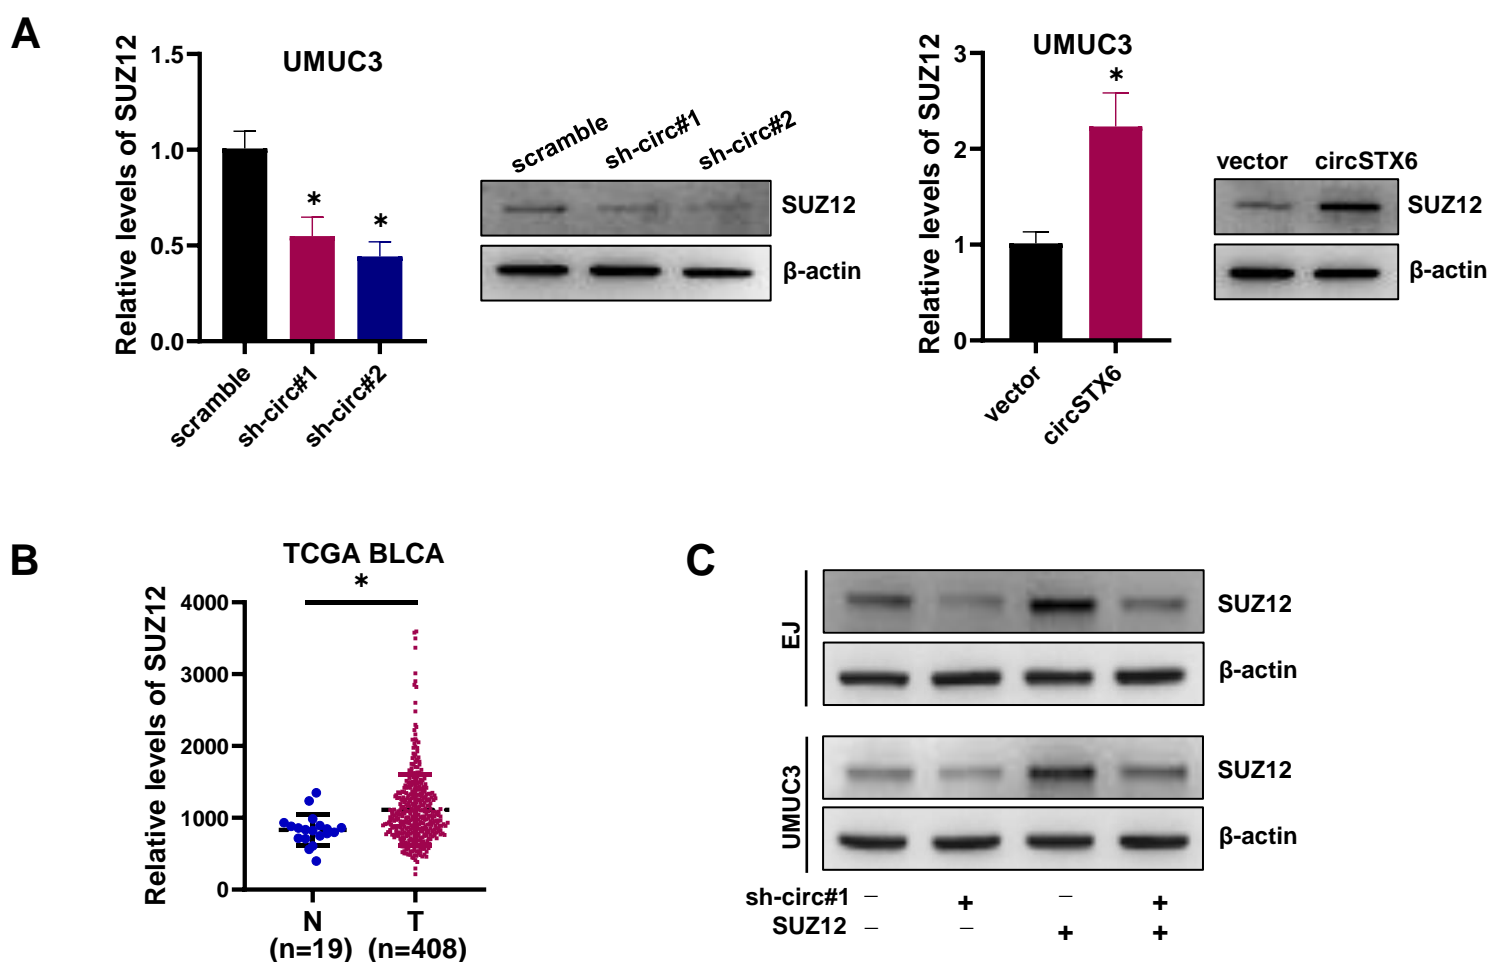

Fig S3. *CircSTX6* enhances the SUZ12 expression in BCa. **A** The mRNA and protein level of SUZ12 in UMUC3 cells stably transfected scramble, sh-circ#1, sh-circ#2, vector or circSTX6. **B** The expression level of *SUZ12* in the TCGA BLCA dataset. **C** Western blot were performed to evaluate the expression of SUZ12 in EJ and UMUC3 cells which were transfected with scramble or sh-circ#1, and those co-transfected with mock or SUZ12. The data are presented as the means  $\pm$  S.D. of at least three independent experiments. \* $P < 0.05$ . P values are calculated by Student's t test in **A** (right) and one-way ANOVA in **A** (left).

Fig.S4

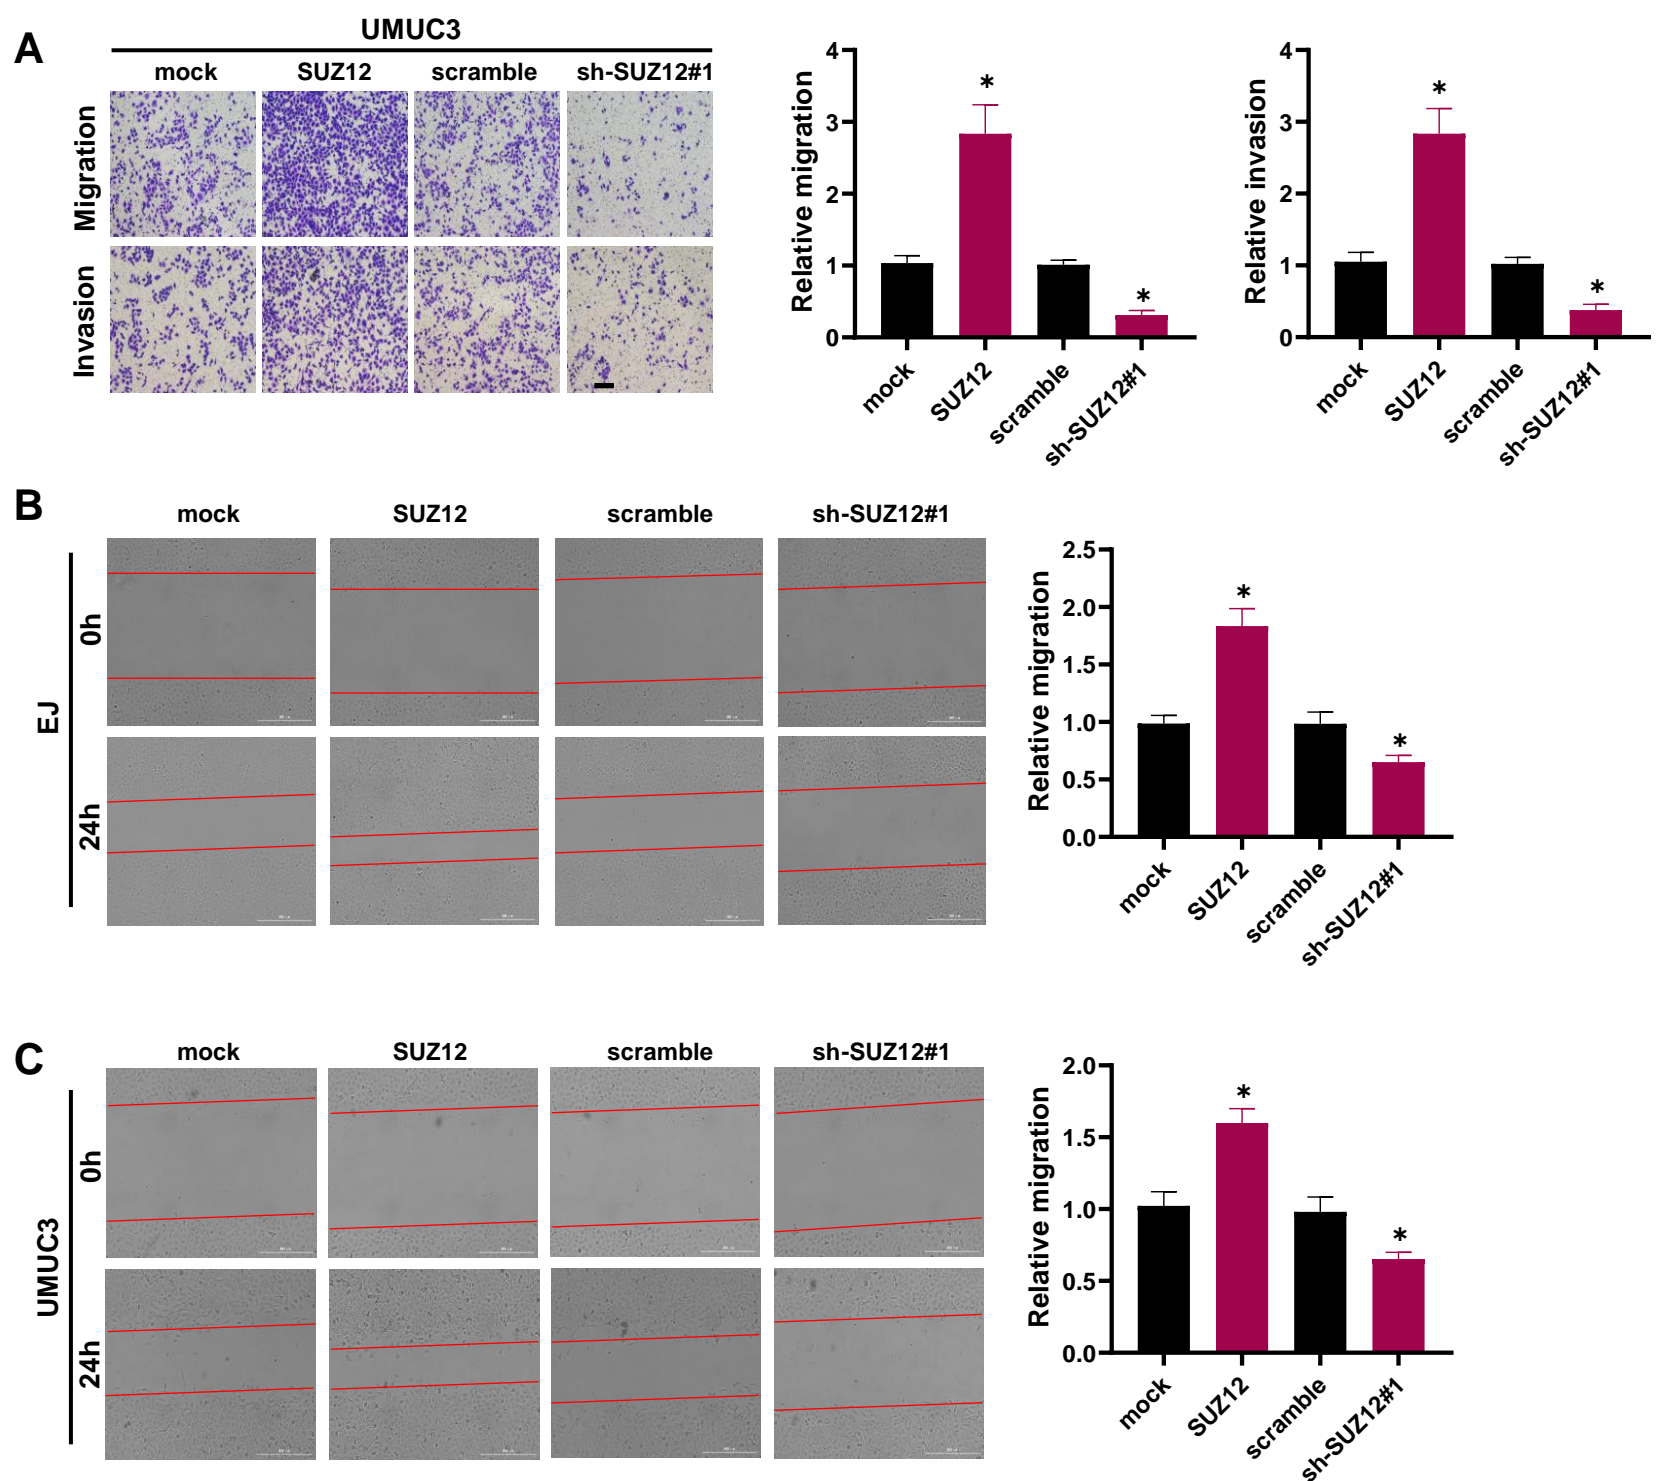

FigS4. Knockdown of SUZ12 inhibits BCa migration and invasion *in vitro*. **A** Transwell assays showed the migration and invasion of UMUC3 cells transfected with mock, SUZ12, scramble or sh-SUZ12#1. Scale bar, 100  $\mu$ m. **B-C** Cell migratory capabilities were assessed in EJ and UMUC3 cells transfected with with mock, SUZ12, scramble or sh-SUZ12#1 by wound healing assays. Scale bar, 400  $\mu$ m. The data are presented as the means  $\pm$  S.D. of at least three independent experiments. \* $P < 0.05$ .  $P$  values are calculated by Student's t test in **A-C**.

**Fig.S5**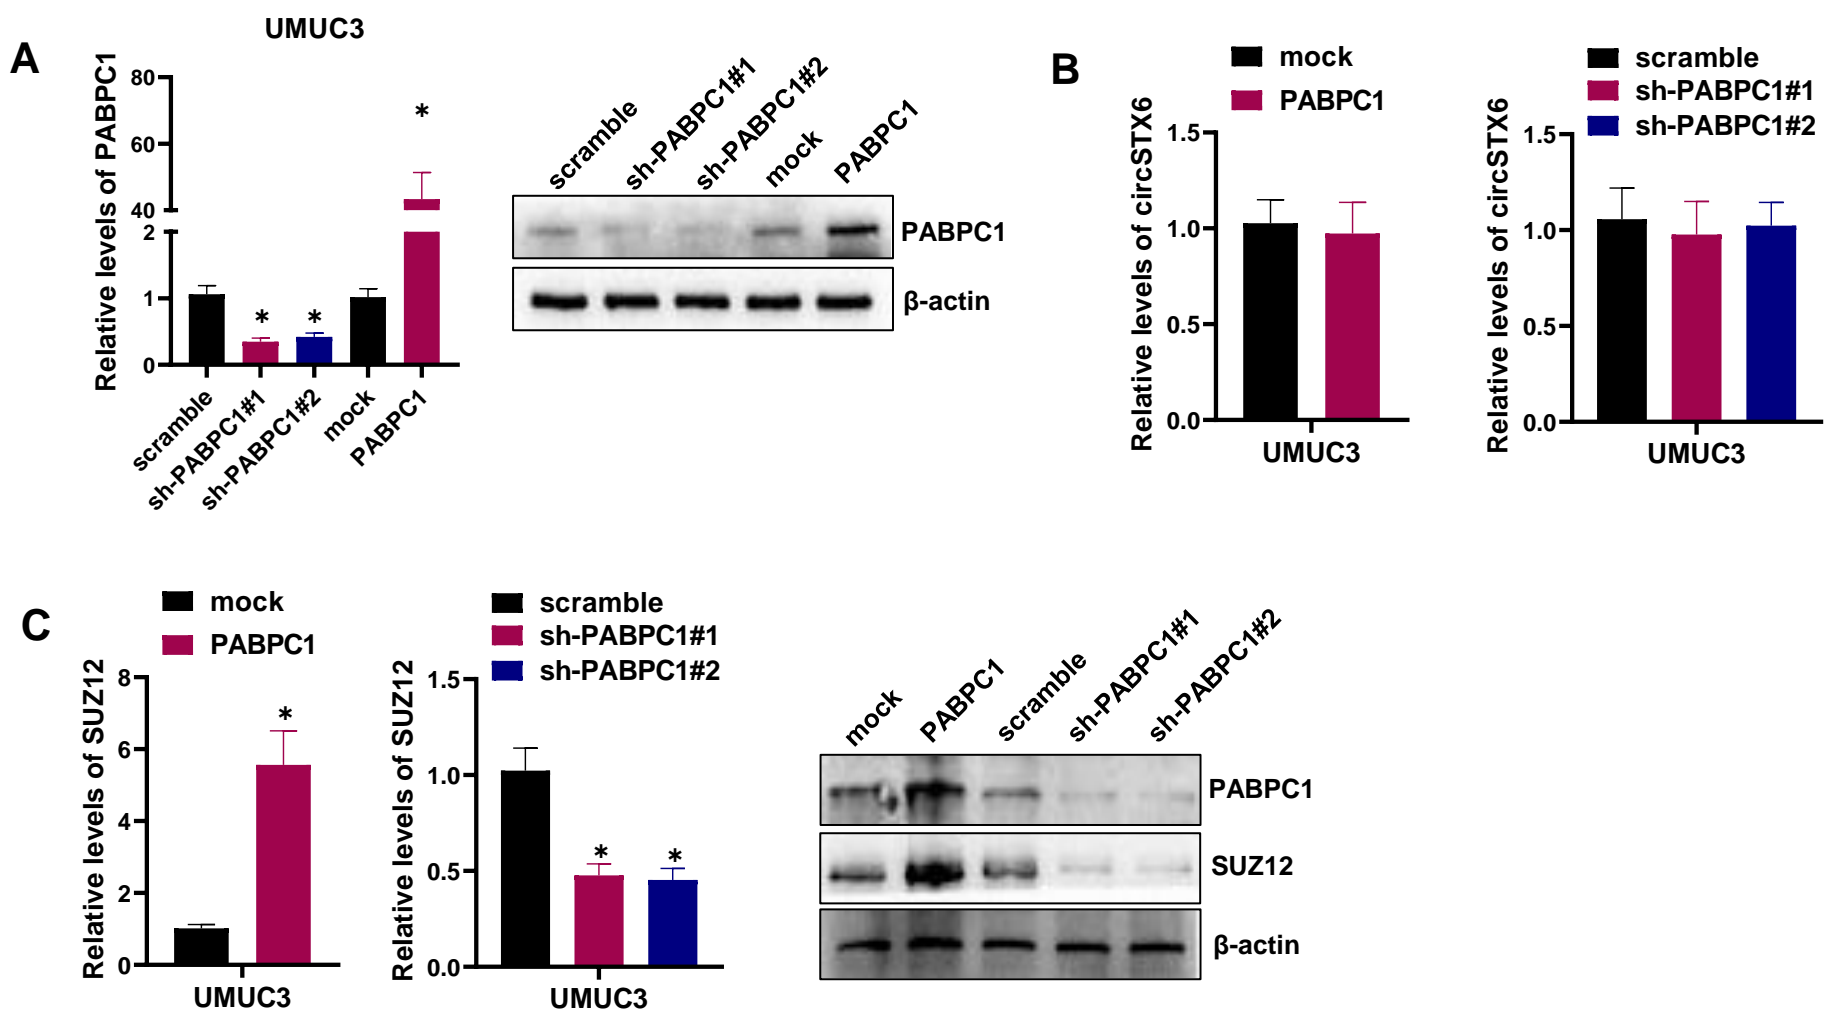

Fig S5. PABPC1 could facilitate the expression level of SUZ12 in UMUC3 cells. **A** The efficiency of PABPC1 knockdown or overexpression in UMUC3 cells was verified by qRT-PCR (left) and western blot (right). **B** qRT-PCR assay showed the expression of *circSTX6* in UMUC3 cells transfected with the indicated plasmids. **C** qRT-PCR and western blot assays showed the expression of SUZ12 in UMUC3 cells transfected with the indicated plasmids. The data are presented as the means  $\pm$  S.D. of at least three independent experiments. \* $P < 0.05$ .  $P$  values are calculated by Student's t test in **A** and **C** and one-way ANOVA in **A** and **C**.

Fig.S6

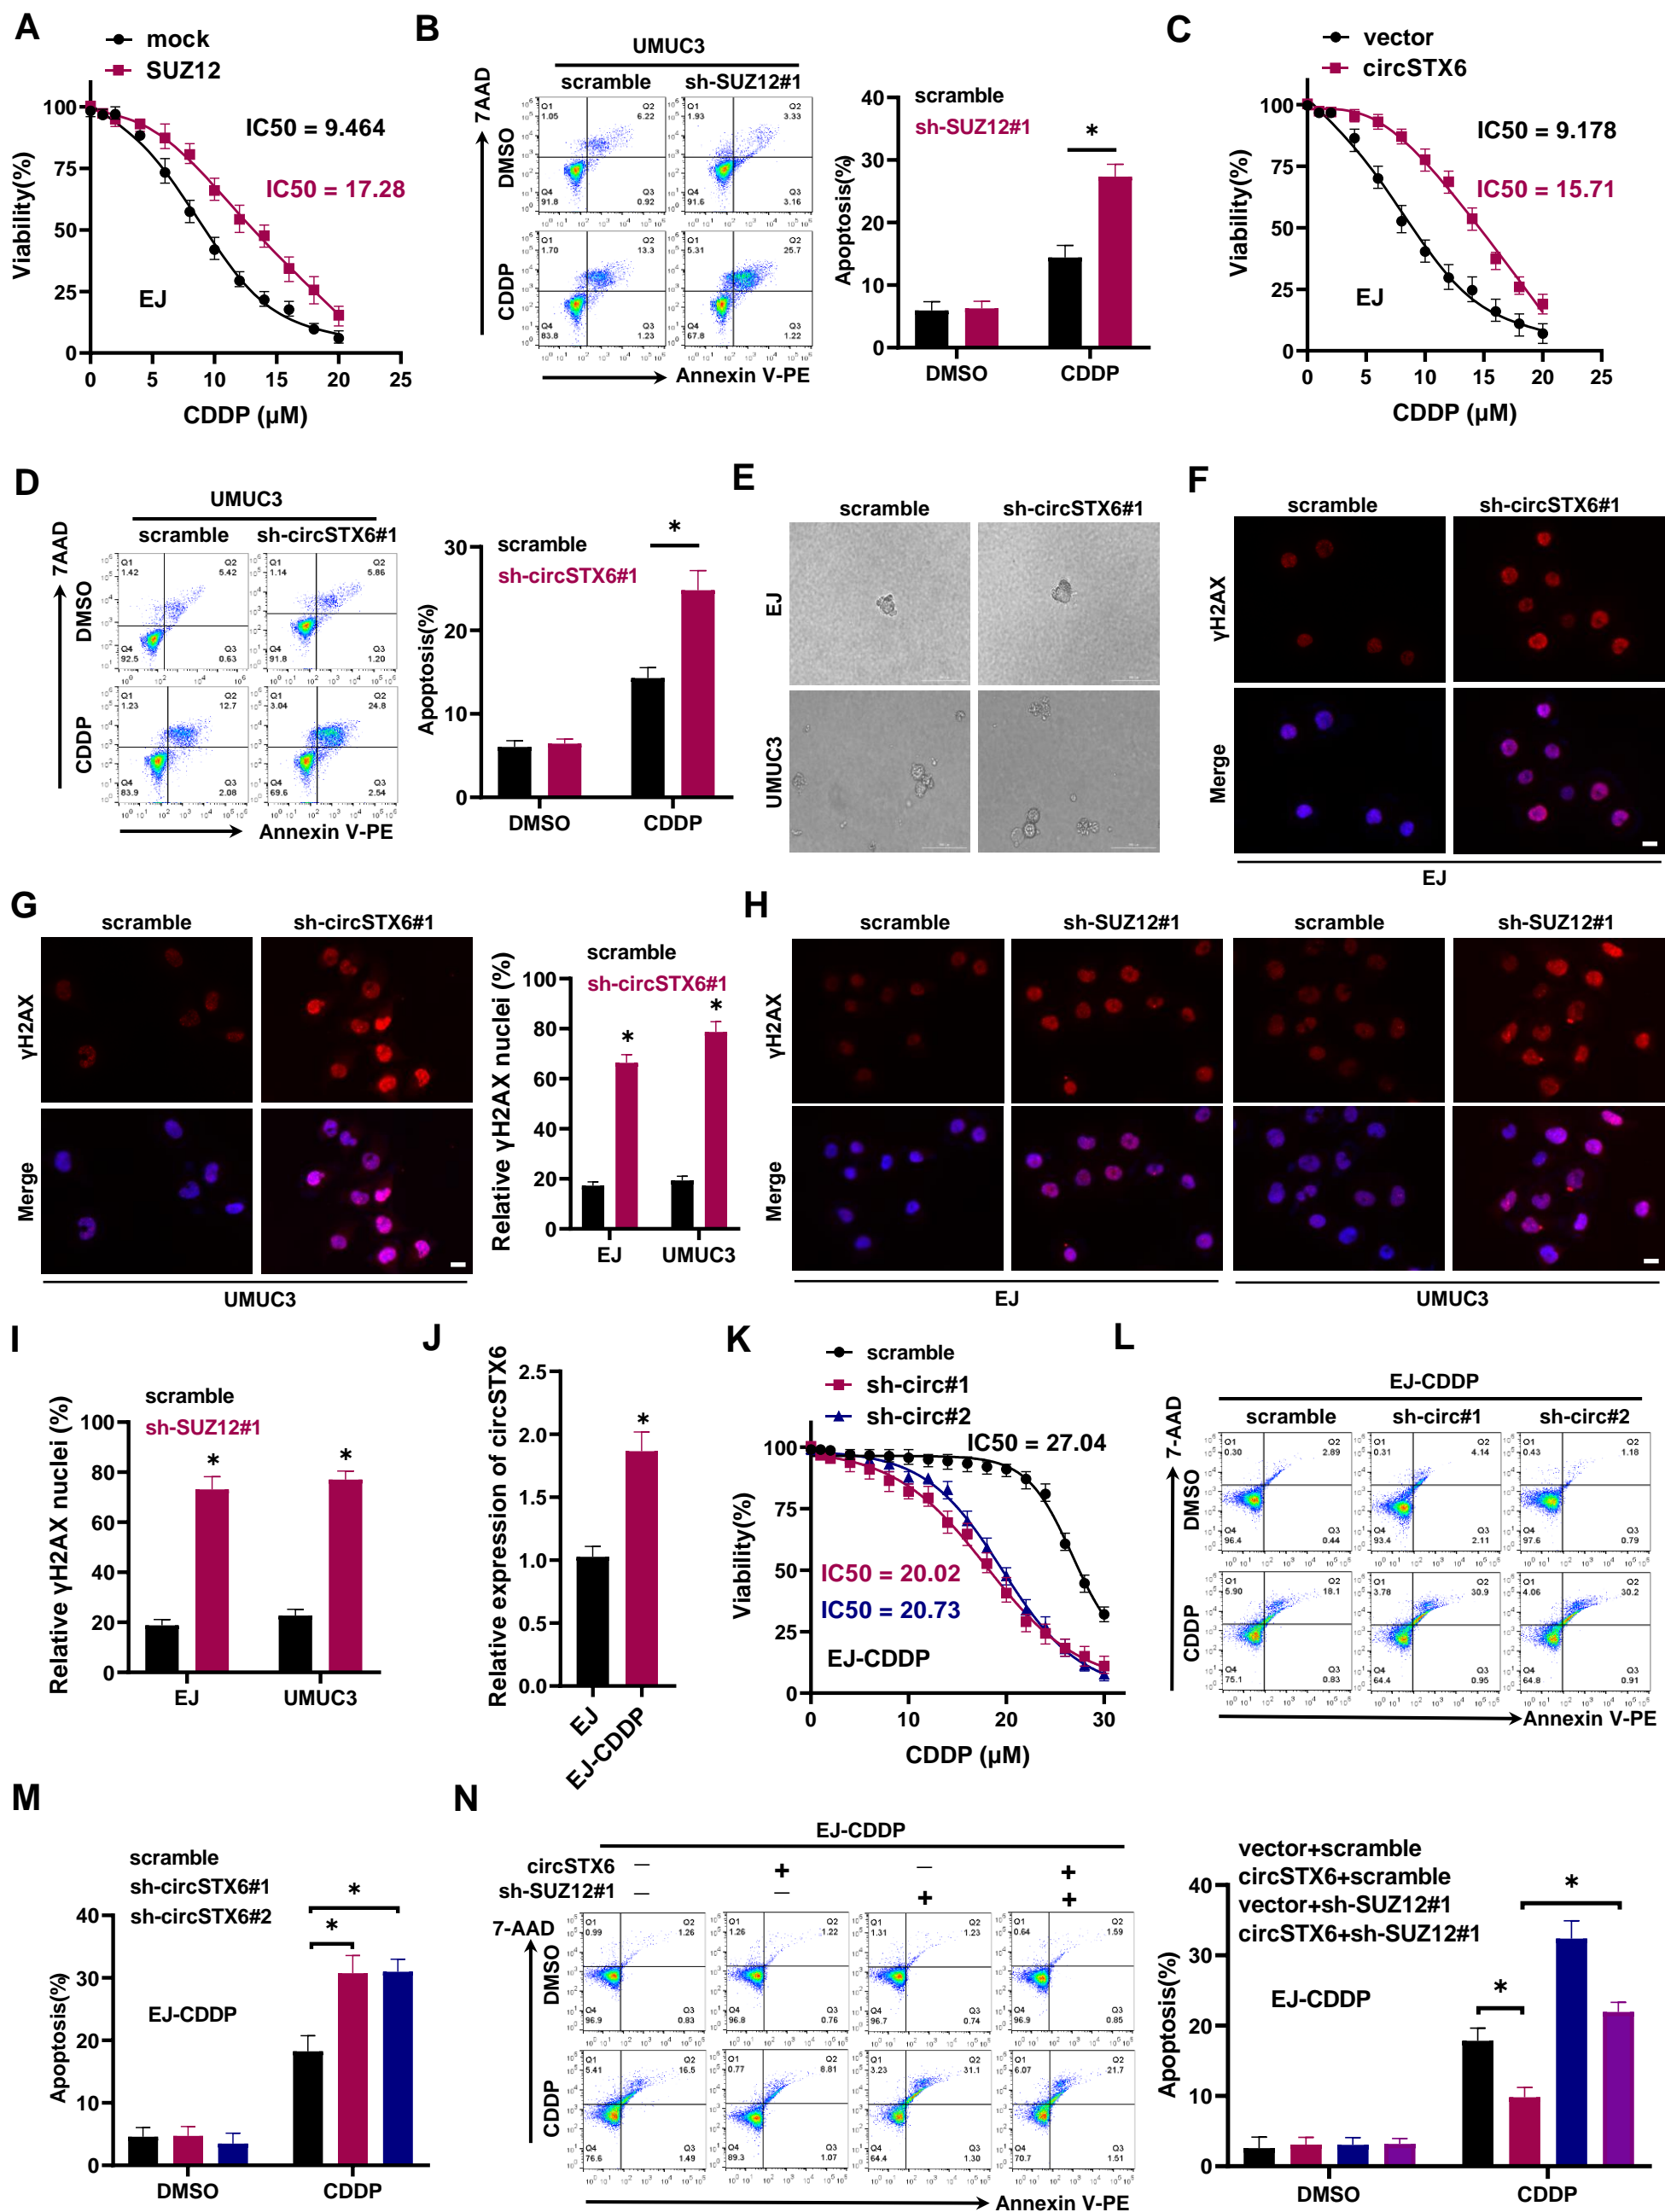

Fig S6. Silencing of *circSTX6*/SUZ12 complex promotes the chemosensitivity of BCa cells to CDDP. **A** Determination of IC50 values for CDDP treatment 24 h in EJ cells which were stably transfected with mock or SUZ12 vector. **B** Flow cytometry apoptosis assays were used to assess apoptosis rate of UMUC3 cells stably transfected with sh-SUZ12#1 after CDDP treatment. **C** Determination of IC50 values for CDDP treatment 24 h in EJ cells which were stably transfected with vector or *circSTX6* plasmid. **D** Flow cytometry apoptosis assays were used to assess apoptosis rate of UMUC3 cells stably transfected with sh-*circSTX6* after CDDP treatment. **E** Tumor sphere formation assays were used to assess the self-renewal capacity of BCa treated with CDDP. The scale bar indicates 100  $\mu\text{m}$ . **F-G** Immunofluorescence staining showed the expression of  $\gamma\text{H2AX}$  in BCa cells treated with CDDP. The scale bar indicates 20  $\mu\text{m}$ . **H-I** Immunofluorescence staining showed the expression of  $\gamma\text{H2AX}$  in BCa cells treated with CDDP. The scale bar indicates 20  $\mu\text{m}$ . **J** qRT-PCR assay showed the relative expression levels of *circSTX6* in the EJ and EJ-CDDP cell lines. **K** Determination of IC50 values for CDDP treatment 24 h in EJ-CDDP cells which were stably transfected with scramble, sh-*circ*#1 or sh-*circ*#2 vector. **L-M** Flow cytometry assay revealed the CDDP effect in EJ-CDDP cells transfected with scramble, sh-*circ*#1 or sh-*circ*#2. **N** Flow cytometry assay revealed the CDDP effect in EJ-CDDP cells transfected with vector or *circSTX6*, and those co-transfected with scramble or sh-SUZ12#1. The data are presented as the means  $\pm$  S.D. of at least three independent experiments.  $*P < 0.05$ . *P* values are calculated by Student's t test in **B**, **D**, **G**, **I** and **J** and one-way ANOVA in **M** and **N**.
